# Supplementary material for: Atomistic Simulation of Lysozyme in Solutions Crowded by Tetraethylene Glycol: Force Field Dependence
Source: MDPI journal article supplement (doi:10.3390/molecules27072110), 2022-03-24
Supplement: s1 [file s1]

Supporting Information for

# **Atomistic Simulation of Lysozyme in Solutions Crowded by Tetraethylene Glycol: Force Field Dependence**

*Donglin Liu, Yejie Qiu, Qing Li, and Haiyang Zhang\**

Department of Biological Science and Engineering, School of Chemistry and Biological  
Engineering, University of Science and Technology Beijing, 100083 Beijing, China

**Corresponding Author**

\*zhanghy@ustb.edu.cn

**Table S1. Calculated Viscosities (mPa•s) of PEG-4 Solutions with Different Concentrations<sup>a</sup>.**

| concentration<br>(% w/v) | Amber14SB            |                   | a99SB- <i>disp</i>   |                   | exp <sup>b</sup> |
|--------------------------|----------------------|-------------------|----------------------|-------------------|------------------|
|                          | $T = 298.15$ K       | $T = 370$ K       | $T = 298.15$ K       | $T = 370$ K       | $T = 298.15$ K   |
| 0                        | $0.31 \pm 0.01$      | $0.16 \pm 0.01$   | $1.01 \pm 0.01$      | $0.36 \pm 0.01$   | 0.89             |
| 15                       | $0.49 \pm 0.01$      | $0.23 \pm 0.01$   | $1.81 \pm 0.01$      | $0.54 \pm 0.01$   | 1.56             |
| 25                       | $0.72 \pm 0.01$      | $0.31 \pm 0.01$   | $2.92 \pm 0.01$      | $0.75 \pm 0.01$   | 2.30             |
| 35                       | $1.14 \pm 0.01$      | $0.42 \pm 0.01$   | $5.31 \pm 0.02$      | $1.08 \pm 0.01$   | 3.42             |
| 45                       | $2.07 \pm 0.01$      | $0.61 \pm 0.01$   | $11.36 \pm 0.06$     | $1.65 \pm 0.01$   | 4.99             |
| 55                       | $4.31 \pm 0.02$      | $0.93 \pm 0.01$   | $29.99 \pm 0.33$     | $2.69 \pm 0.01$   | 7.21             |
| 65                       | $10.98 \pm 0.03$     | $1.50 \pm 0.01$   | $95.68 \pm 0.65$     | $4.63 \pm 0.01$   | 10.36            |
| 75                       | $37.98 \pm 0.11$     | $2.68 \pm 0.01$   | $525.88 \pm 14.42$   | $8.61 \pm 0.03$   | 14.89            |
| 85                       | $223.72 \pm 4.44$    | $5.66 \pm 0.01$   | $1871.10 \pm 118.00$ | $18.21 \pm 0.20$  | 22.50            |
| 95                       | $1185.67 \pm 62.33$  | $13.74 \pm 0.05$  | $2654.89 \pm 137.94$ | $37.55 \pm 0.27$  | 31.80            |
| 112                      | $4057.45 \pm 279.95$ | $109.42 \pm 1.05$ | $4057.45 \pm 279.95$ | $109.42 \pm 1.05$ | 44.63            |

<sup>a</sup>Model parameters of PEG-4 are identical for the both Amber-like force fields. The viscosities were computed by eq 3 from non-equilibrium simulations. The concentration of 112% w/v means a pure PEG-4 liquid.

<sup>b</sup>Obtained from polynomial fits of experimental observations [1].

**Table S2. Calculated Diffusion Constants ( $\times 10^{-5}$  cm<sup>2</sup>/s) of Water in PEG-4 Solutions with Different Concentrations<sup>a</sup>.**

| concentration<br>(% w/v) | Amber14SB       |                  | a99SB- <i>disp</i> |                 |
|--------------------------|-----------------|------------------|--------------------|-----------------|
|                          | $T = 298.15$ K  | $T = 370$ K      | $T = 298.15$ K     | $T = 370$ K     |
| 0                        | $6.13 \pm 0.10$ | $13.80 \pm 0.31$ | $1.91 \pm 0.08$    | $6.37 \pm 0.15$ |
| 15                       | $4.37 \pm 0.11$ | $10.95 \pm 0.24$ | $1.27 \pm 0.04$    | $4.77 \pm 0.14$ |
| 25                       | $3.40 \pm 0.10$ | $8.97 \pm 0.20$  | $0.89 \pm 0.04$    | $3.83 \pm 0.10$ |
| 35                       | $2.44 \pm 0.07$ | $7.25 \pm 0.23$  | $0.57 \pm 0.03$    | $2.92 \pm 0.08$ |
| 45                       | $1.67 \pm 0.08$ | $5.71 \pm 0.18$  | $0.35 \pm 0.02$    | $2.18 \pm 0.09$ |
| 55                       | $1.06 \pm 0.06$ | $4.29 \pm 0.14$  | $0.19 \pm 0.02$    | $1.54 \pm 0.06$ |
| 65                       | $0.58 \pm 0.04$ | $3.11 \pm 0.14$  | $0.09 \pm 0.01$    | $1.05 \pm 0.04$ |
| 75                       | $0.26 \pm 0.02$ | $2.00 \pm 0.11$  | $0.06 \pm 0.01$    | $0.63 \pm 0.03$ |
| 85                       | $0.19 \pm 0.04$ | $1.17 \pm 0.08$  | $0.06 \pm 0.01$    | $0.36 \pm 0.04$ |
| 95                       | $0.13 \pm 0.02$ | $0.62 \pm 0.03$  | $0.06 \pm 0.01$    | $0.21 \pm 0.03$ |
| 112                      | -               | -                | -                  | -               |

<sup>a</sup>Computed by eq 5 using the viscosity in Table S1. The concentration of 112% w/v means a pure PEG-4 liquid.

**Table S3. Volume Fraction (%) of the Crowder PEG-4 and Mass Fraction (%) of Non-Water Components for the Simulated Systems of PEG-4 Solutions and of Protein/PEG-4 Solutions<sup>a</sup>.**

| concentration<br>(% w/v) | PEG-4 solutions |             | protein/PEG-4 solutions |            |
|--------------------------|-----------------|-------------|-------------------------|------------|
|                          | volume          | mass        | volume                  | mass       |
| 0                        | 0.0 ± 0.0       | 0.0 ± 0.0   | 0.0 ± 0.0               | 11.4 ± 0.1 |
| 15                       | 12.4 ± 0.4      | 14.4 ± 0.0  | 7.9 ± 1.3               | 20.4 ± 1.2 |
| 25                       | 21.1 ± 0.6      | 24.1 ± 0.0  | 9.7 ± 0.5               | 22.7 ± 0.3 |
| 35                       | 30.1 ± 0.8      | 33.5 ± 0.0  | 14.8 ± 1.1              | 28.7 ± 0.8 |
| 45                       | 39.2 ± 1.0      | 42.8 ± 0.0  | 21.0 ± 0.7              | 35.5 ± 0.2 |
| 55                       | 48.5 ± 1.3      | 51.9 ± 0.0  | 25.3 ± 1.4              | 40.3 ± 0.8 |
| 65                       | 57.5 ± 1.5      | 60.4 ± 0.0  | 31.0 ± 2.5              | 46.9 ± 1.8 |
| 75                       | 66.9 ± 1.4      | 69.1 ± 0.0  | 39.6 ± 1.5              | 55.7 ± 1.0 |
| 85                       | 76.1 ± 1.2      | 77.7 ± 0.0  | 51.9 ± 1.1              | 67.4 ± 0.7 |
| 95                       | 84.9 ± 0.6      | 86.1 ± 0.0  | 62.7 ± 1.0              | 78.3 ± 0.7 |
| 112                      | 100.0 ± 0.0     | 100.0 ± 0.0 | 86.1 ± 0.5              | 98.8 ± 0.0 |

<sup>a</sup>Fractions were averaged over the four simulation systems (two force fields and two temperatures). Standard deviations of 0.0 indicate a value of < 0.1. The volume fractions were used to estimate a decrease in the diffusion coefficient for hard spheres based on the Enskog theory.

**Table S4. Calculated Diffusion Constants ( $\times 10^{-5}$  cm<sup>2</sup>/s) of PEG-4 in PEG-4 Solutions with Different Concentrations<sup>a</sup>.**

| concentration<br>(% w/v) | Amber14SB      |             | a99SB-disp     |             |
|--------------------------|----------------|-------------|----------------|-------------|
|                          | $T = 298.15$ K | $T = 370$ K | $T = 298.15$ K | $T = 370$ K |
| 0                        | -              | -           | -              | -           |
| 1                        | 2.05 ± 0.75    | 5.36 ± 1.91 | 0.60 ± 0.24    | 2.16 ± 0.74 |
| 15                       | 1.22 ± 0.18    | 3.34 ± 0.38 | 0.44 ± 0.07    | 1.49 ± 0.08 |
| 25                       | 0.89 ± 0.08    | 2.41 ± 0.32 | 0.28 ± 0.03    | 1.14 ± 0.13 |
| 35                       | 0.61 ± 0.05    | 1.85 ± 0.20 | 0.18 ± 0.02    | 0.84 ± 0.07 |
| 45                       | 0.40 ± 0.06    | 1.41 ± 0.10 | 0.10 ± 0.01    | 0.65 ± 0.07 |
| 55                       | 0.21 ± 0.02    | 0.98 ± 0.08 | 0.05 ± 0.01    | 0.46 ± 0.03 |
| 65                       | 0.11 ± 0.01    | 0.70 ± 0.04 | 0.02 ± 0.01    | 0.32 ± 0.02 |
| 75                       | 0.04 ± 0.01    | 0.45 ± 0.03 | 0.02 ± 0.01    | 0.19 ± 0.02 |
| 85                       | 0.03 ± 0.01    | 0.27 ± 0.02 | 0.02 ± 0.01    | 0.11 ± 0.01 |
| 95                       | 0.02 ± 0.01    | 0.15 ± 0.01 | 0.02 ± 0.01    | 0.07 ± 0.01 |
| 112                      | 0.01 ± 0.01    | 0.04 ± 0.01 | 0.01 ± 0.01    | 0.04 ± 0.01 |

<sup>a</sup>Computed by eq 5 using the viscosity in Table S1. The concentration of 112% w/v means a pure PEG-4 liquid. The system of 1% w/v contains one PEG-4 molecule and 2129 water molecules.

**Table S5. Calculated Viscosities (mPa•s) of Protein/PEG-4 Solutions with Different Concentrations<sup>a</sup>.**

| concentration<br>(% w/v) | Amber14SB              |                     | a99SB- <i>disp</i>     |                     |
|--------------------------|------------------------|---------------------|------------------------|---------------------|
|                          | $T = 298.15 \text{ K}$ | $T = 370 \text{ K}$ | $T = 298.15 \text{ K}$ | $T = 370 \text{ K}$ |
| 0                        | $1.36 \pm 0.23$        | $1.04 \pm 0.07$     | $1.57 \pm 0.14$        | $1.50 \pm 0.12$     |
| 15                       | $2.60 \pm 0.17$        | $1.58 \pm 0.11$     | $5.10 \pm 0.92$        | $2.09 \pm 0.18$     |
| 25                       | $1.85 \pm 0.25$        | $2.40 \pm 0.17$     | $4.47 \pm 0.75$        | $2.85 \pm 0.46$     |
| 35                       | $1.47 \pm 0.24$        | $1.58 \pm 0.13$     | $6.76 \pm 0.89$        | $2.90 \pm 0.30$     |
| 45                       | $3.37 \pm 0.91$        | $2.22 \pm 0.69$     | $9.00 \pm 3.19$        | $7.61 \pm 1.28$     |
| 55                       | $5.03 \pm 0.70$        | $1.73 \pm 0.17$     | $16.26 \pm 2.62$       | $2.89 \pm 0.37$     |
| 65                       | $2.77 \pm 0.66$        | $3.15 \pm 0.25$     | $31.97 \pm 3.86$       | $7.37 \pm 0.87$     |
| 75                       | $20.46 \pm 1.26$       | $3.26 \pm 0.72$     | $105.27 \pm 10.03$     | $5.10 \pm 1.85$     |
| 85                       | $57.42 \pm 9.19$       | $8.39 \pm 1.63$     | $89.82 \pm 37.86$      | $15.63 \pm 3.24$    |
| 95                       | $68.75 \pm 12.17$      | $11.98 \pm 0.99$    | $138.76 \pm 45.21$     | $24.70 \pm 4.81$    |
| 112                      | $374.87 \pm 52.93$     | $113.57 \pm 16.89$  | $378.62 \pm 28.43$     | $204.39 \pm 26.03$  |

<sup>a</sup>The viscosities were computed by eq 6 from equilibrium simulations. There are 70 water molecules in the 112% w/v solution.

**Table S6. Comparison of Simulated Proportion of Lysozyme Secondary Structures with the Crystal Structure.**

| PEG (% w/v) | $\alpha$ -helix (%) |                | $\beta$ -sheet (%) |               | $\beta$ -bridge (%) |               | turn (%)       |                | total (%)      |                |
|-------------|---------------------|----------------|--------------------|---------------|---------------------|---------------|----------------|----------------|----------------|----------------|
|             | 298.15 K            | 370 K          | 298.15 K           | 370 K         | 298.15 K            | 370 K         | 298.15         | 370 K          | 298.15         | 370 K          |
| Amber14SB   |                     |                |                    |               |                     |               |                |                |                |                |
| 0           | 30.7 $\pm$ 0.7      | 31.2 $\pm$ 0.2 | 6.3 $\pm$ 0.1      | 6.8 $\pm$ 0.0 | 4.3 $\pm$ 0.0       | 3.9 $\pm$ 0.0 | 25.4 $\pm$ 0.3 | 25.0 $\pm$ 0.4 | 66.7 $\pm$ 0.6 | 66.8 $\pm$ 0.2 |
| 15          | 31.9 $\pm$ 0.3      | 31.0 $\pm$ 0.2 | 6.7 $\pm$ 0.0      | 6.8 $\pm$ 0.0 | 4.1 $\pm$ 0.0       | 3.9 $\pm$ 0.0 | 26.1 $\pm$ 0.8 | 24.9 $\pm$ 0.2 | 68.8 $\pm$ 0.8 | 66.6 $\pm$ 0.2 |
| 25          | 33.2 $\pm$ 0.1      | 30.9 $\pm$ 0.2 | 6.8 $\pm$ 0.1      | 6.7 $\pm$ 0.0 | 4.1 $\pm$ 0.0       | 3.8 $\pm$ 0.1 | 24.6 $\pm$ 0.1 | 25.3 $\pm$ 0.2 | 68.6 $\pm$ 0.1 | 66.7 $\pm$ 0.2 |
| 35          | 31.8 $\pm$ 0.4      | 32.0 $\pm$ 0.2 | 7.1 $\pm$ 0.1      | 6.9 $\pm$ 0.0 | 4.0 $\pm$ 0.1       | 3.7 $\pm$ 0.2 | 24.8 $\pm$ 0.6 | 23.6 $\pm$ 0.2 | 67.6 $\pm$ 0.2 | 66.1 $\pm$ 0.2 |
| 45          | 33.7 $\pm$ 0.1      | 30.9 $\pm$ 0.3 | 6.8 $\pm$ 0.1      | 7.0 $\pm$ 0.1 | 4.1 $\pm$ 0.1       | 3.0 $\pm$ 0.1 | 24.2 $\pm$ 0.3 | 24.6 $\pm$ 1.0 | 68.8 $\pm$ 0.4 | 65.4 $\pm$ 0.6 |
| 55          | 30.9 $\pm$ 0.2      | 31.2 $\pm$ 0.1 | 7.1 $\pm$ 0.1      | 7.0 $\pm$ 0.1 | 4.0 $\pm$ 0.1       | 3.8 $\pm$ 0.1 | 25.8 $\pm$ 0.1 | 24.0 $\pm$ 0.8 | 67.7 $\pm$ 0.2 | 65.9 $\pm$ 0.8 |
| 65          | 30.1 $\pm$ 0.1      | 29.5 $\pm$ 0.7 | 6.7 $\pm$ 0.0      | 6.5 $\pm$ 0.1 | 3.1 $\pm$ 0.0       | 4.0 $\pm$ 0.1 | 25.0 $\pm$ 0.2 | 25.8 $\pm$ 0.3 | 64.9 $\pm$ 0.2 | 65.8 $\pm$ 0.9 |
| 75          | 31.1 $\pm$ 0.1      | 30.7 $\pm$ 0.4 | 6.8 $\pm$ 0.1      | 6.8 $\pm$ 0.1 | 4.0 $\pm$ 0.1       | 3.9 $\pm$ 0.0 | 26.2 $\pm$ 0.1 | 25.8 $\pm$ 0.3 | 68.1 $\pm$ 0.2 | 67.2 $\pm$ 0.3 |
| 85          | 31.2 $\pm$ 0.4      | 31.4 $\pm$ 0.3 | 7.1 $\pm$ 0.5      | 6.9 $\pm$ 0.1 | 3.9 $\pm$ 0.1       | 3.6 $\pm$ 0.3 | 25.6 $\pm$ 0.2 | 25.0 $\pm$ 1.5 | 67.9 $\pm$ 0.5 | 66.9 $\pm$ 1.4 |
| 95          | 31.3 $\pm$ 0.6      | 31.3 $\pm$ 0.1 | 7.0 $\pm$ 0.2      | 7.1 $\pm$ 0.0 | 3.7 $\pm$ 0.1       | 3.8 $\pm$ 0.0 | 25.5 $\pm$ 0.2 | 25.0 $\pm$ 0.2 | 67.6 $\pm$ 1.4 | 67.1 $\pm$ 0.2 |
| 112         | 30.0 $\pm$ 0.2      | 31.2 $\pm$ 0.6 | 6.5 $\pm$ 0.1      | 6.8 $\pm$ 0.1 | 3.9 $\pm$ 0.1       | 3.8 $\pm$ 0.1 | 25.5 $\pm$ 0.3 | 25.8 $\pm$ 0.8 | 65.8 $\pm$ 0.2 | 67.6 $\pm$ 0.2 |
| a99SB-disp  |                     |                |                    |               |                     |               |                |                |                |                |
| 0           | 29.9 $\pm$ 0.1      | 29.7 $\pm$ 0.3 | 6.8 $\pm$ 0.1      | 6.8 $\pm$ 0.1 | 4.0 $\pm$ 0.1       | 3.2 $\pm$ 0.1 | 25.4 $\pm$ 0.1 | 25.4 $\pm$ 0.5 | 66.2 $\pm$ 0.1 | 65.1 $\pm$ 0.9 |
| 15          | 32.0 $\pm$ 0.2      | 29.2 $\pm$ 0.2 | 7.0 $\pm$ 0.1      | 6.6 $\pm$ 0.1 | 4.0 $\pm$ 0.0       | 4.0 $\pm$ 0.1 | 23.9 $\pm$ 0.3 | 24.0 $\pm$ 0.1 | 66.9 $\pm$ 0.4 | 63.7 $\pm$ 0.2 |
| 25          | 30.5 $\pm$ 0.2      | 30.9 $\pm$ 0.3 | 6.8 $\pm$ 0.1      | 6.9 $\pm$ 0.1 | 4.0 $\pm$ 0.0       | 3.9 $\pm$ 0.1 | 25.0 $\pm$ 0.1 | 24.0 $\pm$ 0.5 | 66.3 $\pm$ 0.2 | 65.6 $\pm$ 0.3 |
| 35          | 32.1 $\pm$ 0.1      | 29.2 $\pm$ 0.2 | 7.2 $\pm$ 0.2      | 6.8 $\pm$ 0.0 | 3.9 $\pm$ 0.1       | 3.7 $\pm$ 0.1 | 24.6 $\pm$ 0.3 | 24.0 $\pm$ 0.3 | 67.8 $\pm$ 0.3 | 63.8 $\pm$ 0.6 |
| 45          | 33.1 $\pm$ 0.6      | 31.5 $\pm$ 0.3 | 7.1 $\pm$ 0.1      | 6.9 $\pm$ 0.0 | 3.9 $\pm$ 0.0       | 3.9 $\pm$ 0.0 | 23.4 $\pm$ 0.2 | 24.4 $\pm$ 0.3 | 67.5 $\pm$ 0.8 | 66.7 $\pm$ 0.2 |
| 55          | 30.5 $\pm$ 0.8      | 31.2 $\pm$ 0.1 | 6.8 $\pm$ 0.0      | 6.6 $\pm$ 0.0 | 4.1 $\pm$ 0.0       | 4.1 $\pm$ 0.0 | 24.4 $\pm$ 0.2 | 23.8 $\pm$ 0.2 | 65.8 $\pm$ 0.7 | 65.6 $\pm$ 0.5 |
| 65          | 31.3 $\pm$ 0.2      | 31.1 $\pm$ 0.1 | 7.0 $\pm$ 0.0      | 6.9 $\pm$ 0.0 | 4.0 $\pm$ 0.0       | 3.8 $\pm$ 0.0 | 24.3 $\pm$ 0.2 | 24.9 $\pm$ 0.1 | 66.6 $\pm$ 0.3 | 66.8 $\pm$ 0.1 |
| 75          | 31.9 $\pm$ 0.1      | 31.2 $\pm$ 0.1 | 7.7 $\pm$ 0.2      | 6.8 $\pm$ 0.1 | 3.8 $\pm$ 0.1       | 3.1 $\pm$ 0.0 | 25.4 $\pm$ 0.2 | 22.9 $\pm$ 0.2 | 68.8 $\pm$ 0.3 | 64.1 $\pm$ 0.4 |
| 85          | 29.2 $\pm$ 0.3      | 31.5 $\pm$ 0.1 | 6.6 $\pm$ 0.0      | 7.0 $\pm$ 0.0 | 4.1 $\pm$ 0.1       | 3.9 $\pm$ 0.0 | 26.5 $\pm$ 0.5 | 24.1 $\pm$ 0.2 | 66.4 $\pm$ 0.2 | 66.5 $\pm$ 0.2 |
| 95          | 30.1 $\pm$ 0.2      | 29.9 $\pm$ 0.1 | 7.4 $\pm$ 0.1      | 6.8 $\pm$ 0.1 | 3.8 $\pm$ 0.1       | 3.9 $\pm$ 0.0 | 23.9 $\pm$ 0.6 | 26.0 $\pm$ 0.5 | 65.2 $\pm$ 0.8 | 66.6 $\pm$ 0.4 |
| 112         | 31.2 $\pm$ 0.2      | 31.2 $\pm$ 0.2 | 7.4 $\pm$ 0.2      | 6.7 $\pm$ 0.1 | 3.7 $\pm$ 0.1       | 3.9 $\pm$ 0.1 | 26.0 $\pm$ 0.2 | 25.6 $\pm$ 0.3 | 68.2 $\pm$ 0.3 | 67.3 $\pm$ 0.4 |
| crystal     | 30.2                |                | 6.2                |               | 4.7                 |               | 26.4           |                | 67.4           |                |

**Table S7. Calculated Diffusion Constants ( $\times 10^{-5} \text{ cm}^2/\text{s}$ ) of water in Protein/PEG-4 Solutions with Different Concentrations<sup>a</sup>.**

| concentration<br>(% w/v) | Amber14SB              |                     | a99SB- <i>disp</i>     |                     |
|--------------------------|------------------------|---------------------|------------------------|---------------------|
|                          | $T = 298.15 \text{ K}$ | $T = 370 \text{ K}$ | $T = 298.15 \text{ K}$ | $T = 370 \text{ K}$ |
| 0                        | $5.05 \pm 0.07$        | $11.55 \pm 0.16$    | $1.63 \pm 0.03$        | $5.33 \pm 0.08$     |
| 15                       | $4.19 \pm 0.06$        | $10.06 \pm 0.15$    | $1.14 \pm 0.02$        | $4.25 \pm 0.06$     |
| 25                       | $3.87 \pm 0.05$        | $9.43 \pm 0.15$     | $1.09 \pm 0.02$        | $4.11 \pm 0.06$     |
| 35                       | $3.34 \pm 0.06$        | $8.45 \pm 0.13$     | $0.85 \pm 0.02$        | $3.50 \pm 0.05$     |
| 45                       | $2.59 \pm 0.05$        | $7.09 \pm 0.11$     | $0.64 \pm 0.01$        | $2.90 \pm 0.04$     |
| 55                       | $2.20 \pm 0.05$        | $6.39 \pm 0.10$     | $0.47 \pm 0.01$        | $2.48 \pm 0.04$     |
| 65                       | $1.79 \pm 0.04$        | $5.44 \pm 0.12$     | $0.29 \pm 0.01$        | $1.86 \pm 0.04$     |
| 75                       | $1.02 \pm 0.03$        | $3.93 \pm 0.08$     | $0.15 \pm 0.01$        | $1.32 \pm 0.03$     |
| 85                       | $0.34 \pm 0.01$        | $2.13 \pm 0.06$     | $0.10 \pm 0.01$        | $0.75 \pm 0.02$     |
| 95                       | $0.22 \pm 0.01$        | $1.17 \pm 0.04$     | $0.11 \pm 0.01$        | $0.31 \pm 0.01$     |
| 112                      | $0.07 \pm 0.02$        | $0.14 \pm 0.02$     | $0.03 \pm 0.01$        | $0.09 \pm 0.01$     |

<sup>a</sup> Computed by eq 5 using the viscosity in Table S4. There are 70 water molecules in the 112% w/v solution.

**Table S8. Calculated Diffusion Constants ( $\times 10^{-5} \text{ cm}^2/\text{s}$ ) of PEG-4 in Protein/PEG-4 Solutions with Different Concentrations.**

| concentration<br>(% w/v) | Amber14SB              |                     | a99SB- <i>disp</i>     |                     |
|--------------------------|------------------------|---------------------|------------------------|---------------------|
|                          | $T = 298.15 \text{ K}$ | $T = 370 \text{ K}$ | $T = 298.15 \text{ K}$ | $T = 370 \text{ K}$ |
| 0                        | -                      | -                   | -                      | -                   |
| 15                       | $0.70 \pm 0.12$        | $2.09 \pm 0.33$     | $0.27 \pm 0.03$        | $1.01 \pm 0.12$     |
| 25                       | $0.68 \pm 0.10$        | $1.89 \pm 0.24$     | $0.25 \pm 0.03$        | $0.96 \pm 0.09$     |
| 35                       | $0.58 \pm 0.07$        | $1.66 \pm 0.18$     | $0.19 \pm 0.02$        | $0.80 \pm 0.09$     |
| 45                       | $0.40 \pm 0.04$        | $1.29 \pm 0.12$     | $0.14 \pm 0.01$        | $0.62 \pm 0.05$     |
| 55                       | $0.33 \pm 0.04$        | $1.16 \pm 0.11$     | $0.10 \pm 0.01$        | $0.54 \pm 0.04$     |
| 65                       | $0.27 \pm 0.02$        | $0.93 \pm 0.09$     | $0.06 \pm 0.01$        | $0.38 \pm 0.03$     |
| 75                       | $0.13 \pm 0.01$        | $0.64 \pm 0.05$     | $0.03 \pm 0.01$        | $0.27 \pm 0.02$     |
| 85                       | $0.04 \pm 0.01$        | $0.32 \pm 0.02$     | $0.02 \pm 0.01$        | $0.15 \pm 0.01$     |
| 95                       | $0.03 \pm 0.01$        | $0.17 \pm 0.01$     | $0.03 \pm 0.01$        | $0.07 \pm 0.01$     |
| 112                      | $0.01 \pm 0.01$        | $0.03 \pm 0.01$     | $0.01 \pm 0.01$        | $0.02 \pm 0.01$     |

<sup>a</sup> Computed by eq 5 using the viscosity in Table S4. There are 70 water molecules in the 112% w/v solution.

**Table S9. Calculated Diffusion Constants ( $\times 10^{-7} \text{ cm}^2/\text{s}$ ) of Lysozyme in Protein/PEG-4 Solutions with Different Concentrations<sup>a</sup>.**

| concentration<br>(% w/v) | Amber14SB              |                     | a99SB- <i>disp</i>     |                     |
|--------------------------|------------------------|---------------------|------------------------|---------------------|
|                          | $T = 298.15 \text{ K}$ | $T = 370 \text{ K}$ | $T = 298.15 \text{ K}$ | $T = 370 \text{ K}$ |
| 0                        | $23.08 \pm 7.68$       | $40.81 \pm 19.41$   | $12.01 \pm 2.41$       | $21.12 \pm 7.76$    |
| 15                       | $8.76 \pm 1.34$        | $19.16 \pm 4.87$    | $4.76 \pm 1.26$        | $15.59 \pm 3.01$    |
| 25                       | $9.12 \pm 2.67$        | $13.91 \pm 5.69$    | $3.84 \pm 0.82$        | $13.11 \pm 2.19$    |
| 35                       | $13.12 \pm 3.60$       | $14.05 \pm 5.91$    | $2.19 \pm 1.19$        | $11.57 \pm 3.65$    |
| 45                       | $3.95 \pm 0.95$        | $11.01 \pm 1.72$    | $1.59 \pm 0.38$        | $4.95 \pm 1.17$     |
| 55                       | $3.42 \pm 0.80$        | $15.46 \pm 4.90$    | $1.17 \pm 0.50$        | $7.39 \pm 2.94$     |
| 65                       | $4.90 \pm 0.73$        | $9.43 \pm 2.27$     | $0.46 \pm 0.13$        | $3.52 \pm 1.23$     |
| 75                       | $0.94 \pm 0.24$        | $6.71 \pm 1.41$     | $0.20 \pm 0.02$        | $3.62 \pm 0.65$     |
| 85                       | $0.26 \pm 0.03$        | $1.88 \pm 0.30$     | $0.17 \pm 0.04$        | $1.29 \pm 0.21$     |
| 95                       | $0.19 \pm 0.02$        | $1.60 \pm 0.55$     | $0.13 \pm 0.03$        | $0.72 \pm 0.10$     |
| 112                      | $0.05 \pm 0.01$        | $0.14 \pm 0.01$     | $0.04 \pm 0.01$        | $0.11 \pm 0.02$     |

<sup>a</sup>Computed by eq 7 using the viscosity in Table S4. There are 70 water molecules in the 112% w/v solution.

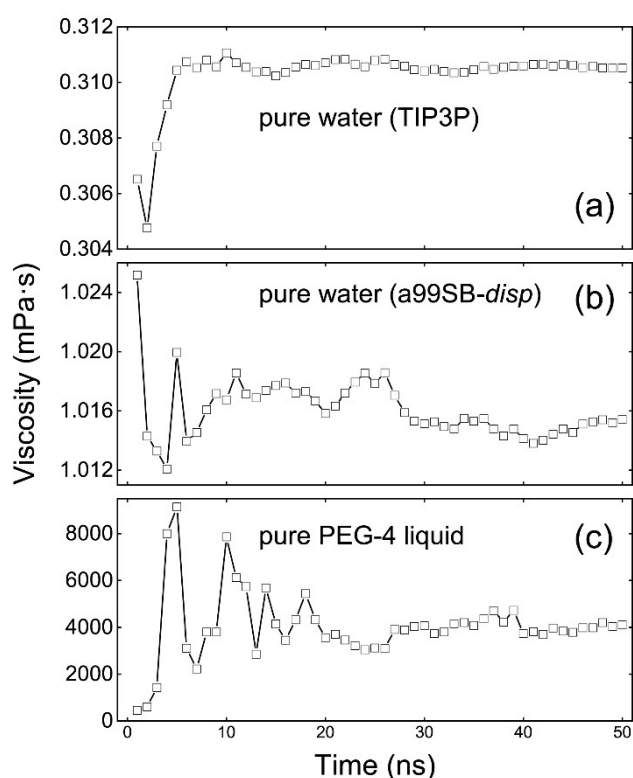

**Figure S1.** Calculated viscosities of the pure water using TIP3P (a) and a99SB-*disp* (b) models and pure PEG-4 liquid (c) as a function of simulation time.

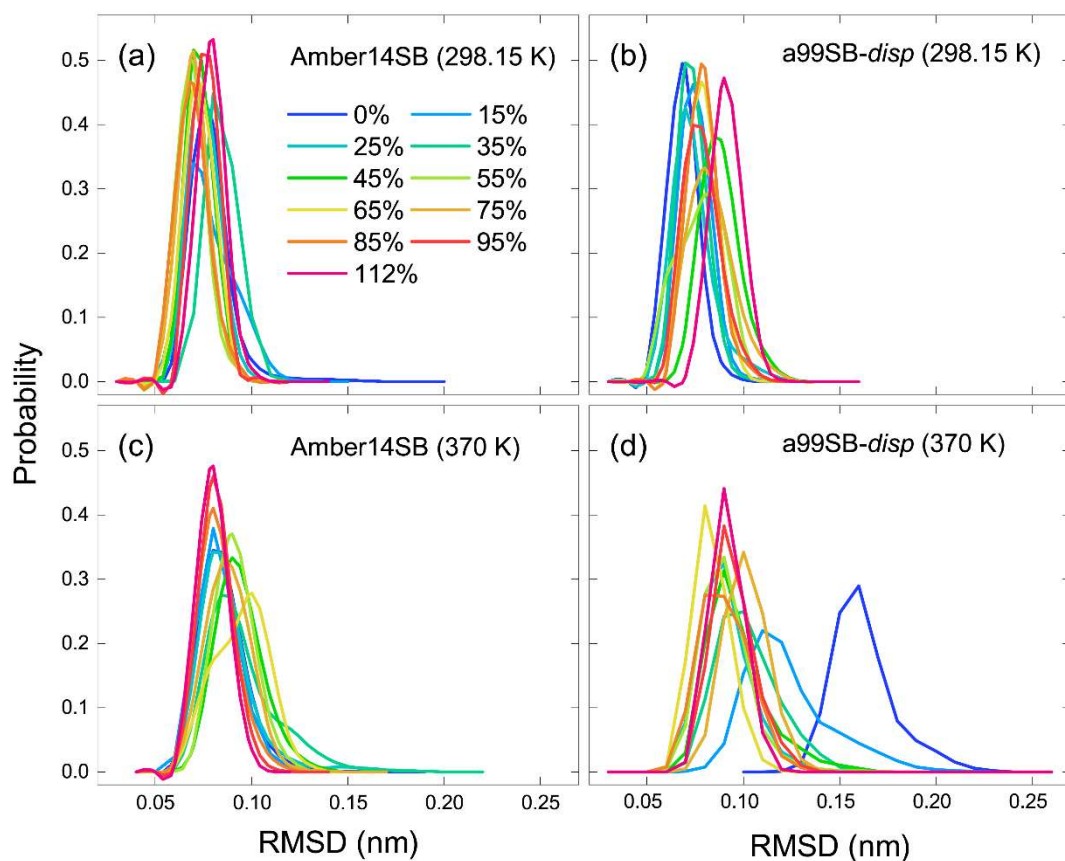

**Figure S2.** Probability distribution of the RMSDs for lysozyme using Amber14SB (*left*) and a99SB-*disp* (*right*) force fields during the simulations at 298.15 K (a-b) and 370 K (c-d).

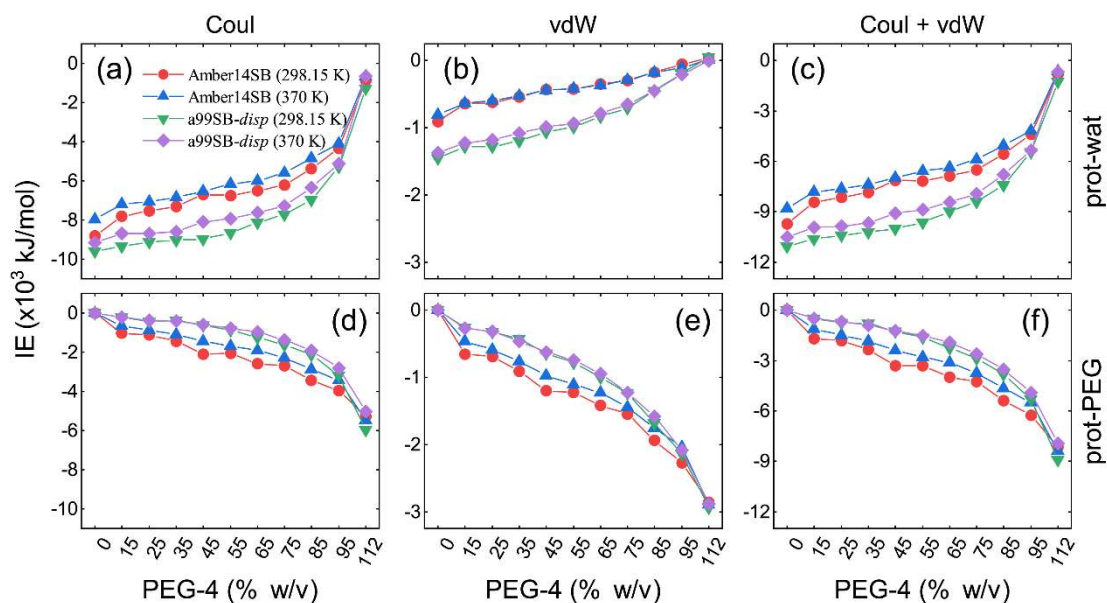

**Figure S3.** Interaction energy between lysozyme and solvent molecules of water (*top*) and PEG-4 (*bottom*) for the simulations of lysozyme in different PEG-4 concentrations using Amber14SB and a99SB-*disp* force fields at 298.15 K and 370 K.



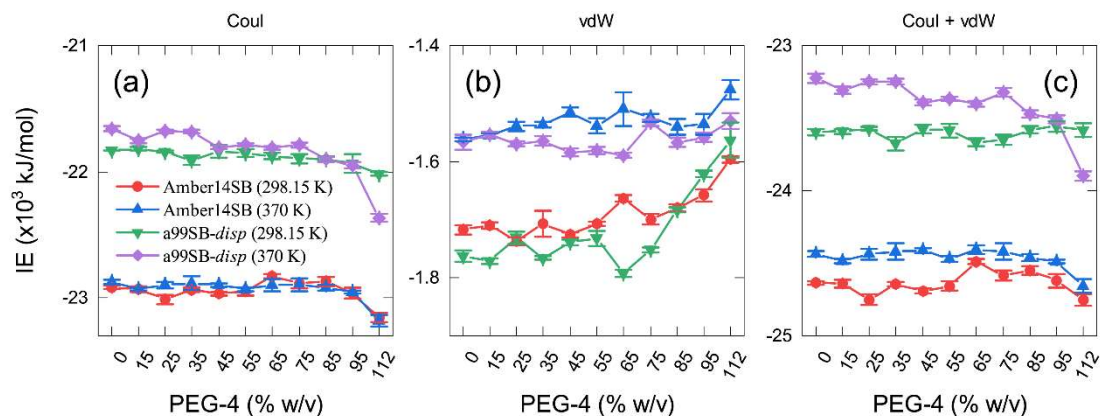

**Figure S4.** Intramolecular nonbonded interaction energy of protein for the simulations of lysozyme in different PEG-4 concentrations using Amber14SB and a99SB-*disp* force fields at 298.15 K and 370 K.

## Reference

1. Liu, P.; Liu, Z.; Zhao, T.; Liu, F.; Liao, Q. Density, Viscosity, and Spectroscopic Nature for the Binary System of Tetraethylene Glycol (1) + Water (2) T = (298.15 to 323.15) K. *Int. J. Thermophys.* **2021**, *42*, 93. <https://doi.org/10.1007/s10765-021-02851-8>
